# Supplementary material
Source: PubMed Central journal article supplement (PMC2704923)
Supplement: NIHMS103675-supplement-4.pdf [file NIHMS103675-supplement-4.pdf]

# Figure S2

a

```

HsCENP-N -----MDETVAEFIKRTILKIPMNELTTILKAWDFLSENQLQTVNFR
BtCENP-N -----MDETLAEFFRRTILKIPMTEMMTILKTWNFMSENQLQTVNFR
MmCENP-N -----MKENVAEFLRRTILKIPLSEMKSILEAWDFLSEDQLQTINLK
GgCENP-N -----MDEVIVEYIRRTVLKIPRDEIMAVLQKWGFLSEAQLQTINFR
XlCENP-N MAPAAEIVQKRKRQSA LVMDEWLAEFIKRTILKLPFSETATILKTWGFLTESELOTFTLR

HsCENP-N * *
QRKESVVOHLIHLCEEKRASISDAALLDIIYMQFHQHOKVWDFVFQMSKGPGEVDLDFDMK
BtCENP-N * *
QRKESIVQDLVLLCEEENHASLNDAAHLDDIIYTOFHRHQKIWDVFQMSKAPGDDIDLDFDME
MmCENP-N * *
QRKDYLAQEVILLCEDKRASLDDVVLLDIVYTQFHRHQKLWNVVFQMSKEPGEVDLDFDME
GgCENP-N * *
QTKEGISHSVAQLCEESSADLKQAALLDIIYNHIYPNKRVWSVYHMNKT-GEETDFFDFR
XlCENP-N * *
YPKEVTATEVVRFCARNATLDHAAALDLVFNHAYSNNKKTWTVYQMSKRLESENDLDFDAS

HsCENP-N * *
QFKNSFKKILQRALKNVTVSFRTEENAVWIRIAWGTQYTKPNQYKPTYVVVYSQTPYAF
BtCENP-N * *
QFKSSFKKILQRALKNVTVSFRDAEENS VWIRIAWGTQYKKNQYKPAYVVVYSQTPYAF
MmCENP-N * *
QFQSSFKRILQRALKNVTVSFRVYEKDSVWIRVAWGTQYSQPNQYKPTFVVVYPQTPYAF
GgCENP-N * *
DFKKKFRRQIQSALINVTINFREYEDNAIWIRIAWGTPTYTKPNQYKTSYVVVYHSQTPYVF
XlCENP-N * *
EFKLOQFKKSIHAVSKNVTINFKEFG-EALWIRIAWGTHTNSRPNQYKATFAVYHSQTPYVF

HsCENP-N *
TSSSMLRRNTPLLGOALT IASKHHQIVKMDLRSRYLDSLKAIVFKQYNQTFETHNSTTPL
BtCENP-N *
TSSSRLKSNLPLLGOALT VASKHHQIVKMDLRSRYLDSLKAIVFKQYNQSFETHNCTTSL
MmCENP-N *
ISSCHLKNTVPLLHQALKVASKHHQIVHLDLRSRHLDSLKAIVFREYNQTCENYSSTTSL
GgCENP-N *
ISASVLRSNLPLLQAMVVASNYHDIHEMELRSHCLNSLKDIVFKRYSQNFQTN---YPL
XlCENP-N *
ITG-LGKACQPLMCQALVIASKYSQIQEMELKSRCLESLKDIVFKRFNQPFSSHHSKPHE

HsCENP-N
QERSLGLDINMDSRIIHENIVEKERVORITQETFGDYPOQPQLEFAQYKLETKFKSG-LNG
BtCENP-N
QEGSLGLDINMDSRIIHENKVEKERVORVTOEIFGDYPOQRLEFAQYKLETKFKSD-LNG
MmCENP-N
QEASL--SMCLDSKITHENTEEKVRVHRVTQETFGTYPOQPQLEFAQYKLETKFKSN-IGG
GgCENP-N
QERNV-LTENVDLRINDENRSEKERIYRLNQESFGNGPQPKLDFAQYKLETMFKSD-PKW
XlCENP-N
KALTP--NIVDPRVTYENMREKDRVYHLTCETFGEGPLPKLELAS YKLETMFKADSAMS

HsCENP-N
SILAE RKEPLRCLIKFSSPHLLEALKSLAPAGIADAPLSPLLTCIPNKRMYFKIRDK--
BtCENP-N
GILAE REEPLRCLVKFSSPHLLEALKSLAPAGIADAPLSPLLTCIPNKGKNYFKIRDK--
MmCENP-N
GLLADRKEPFRCLVKFSSPHLLEALKSLAPAGIADAPLSPLLTCIPSKKNYFKIRDK--
GgCENP-N
DVLE-KKEPFRCLVKFSSPHLLESLKSLAPAGLADAPLSPLLTCIPQKARNYFKIREKKS
XlCENP-N
GNLTAVNEPFRCVVKFSSPHLLEAIRSLAPAGIAEAPISTLLSCIPHKARNYFKITEKRS

HsCENP-N -----
BtCENP-N -----
MmCENP-N -----
GgCENP-N LHPGSFVSP--
XlCENP-N MHPSSSQPTNV

```

b

|          | % Identity to HsCENP-N |         |
|----------|------------------------|---------|
|          | 1-289                  | 290-339 |
| BtCENP-N | 84                     | 93      |
| MmCENP-N | 70                     | 93      |
| GgCENP-N | 56                     | 83      |
| XlCENP-N | 70                     | 68      |
