# Supplementary material
Source: PubMed Central journal article supplement (PMC2704923)

Figure S1

a

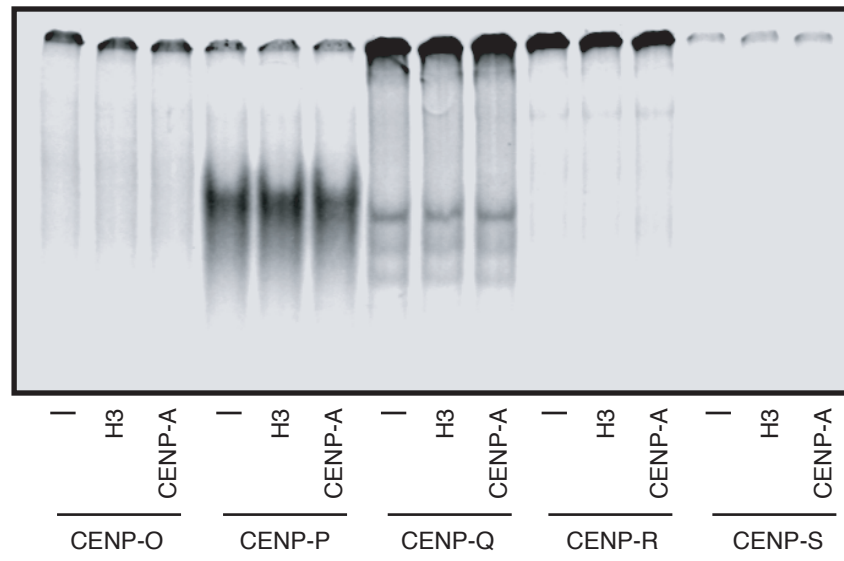

b

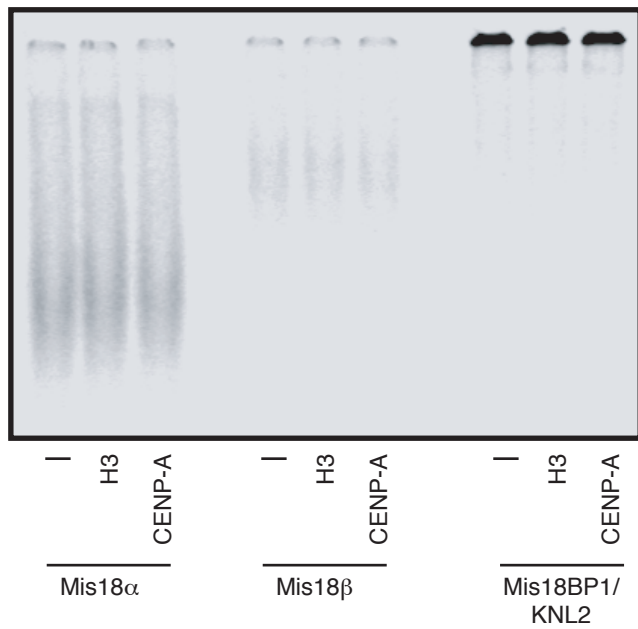

c

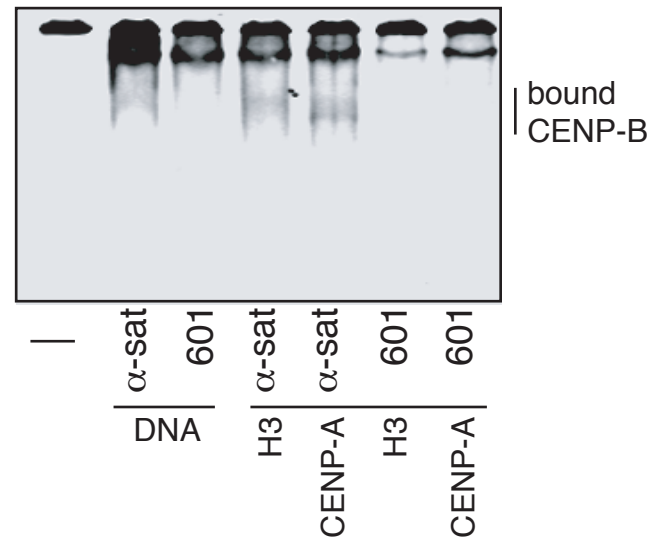

d

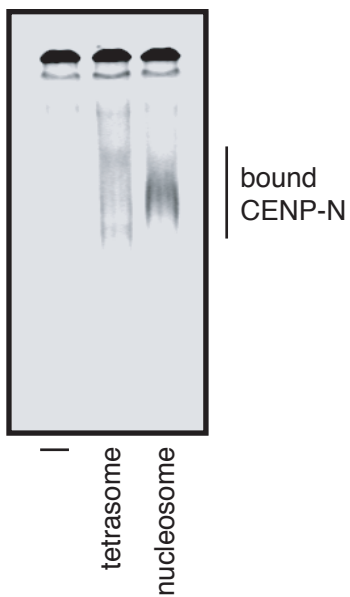

e

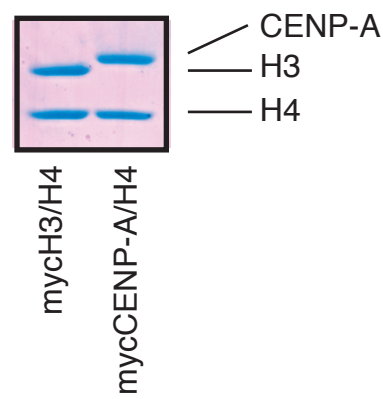

f

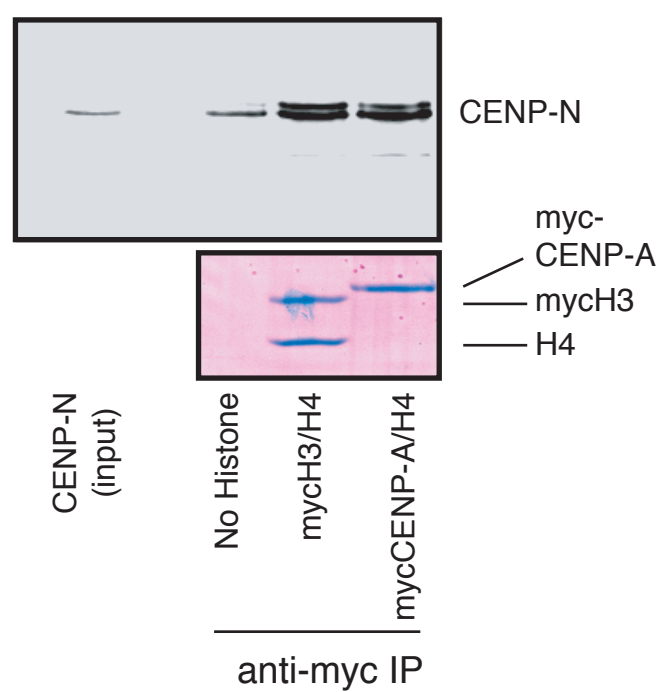

Supplement: NIHMS103675-supplement-3.pdf [file NIHMS103675-supplement-3.pdf]

# Figure S3

**a**

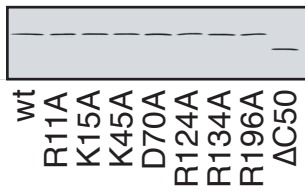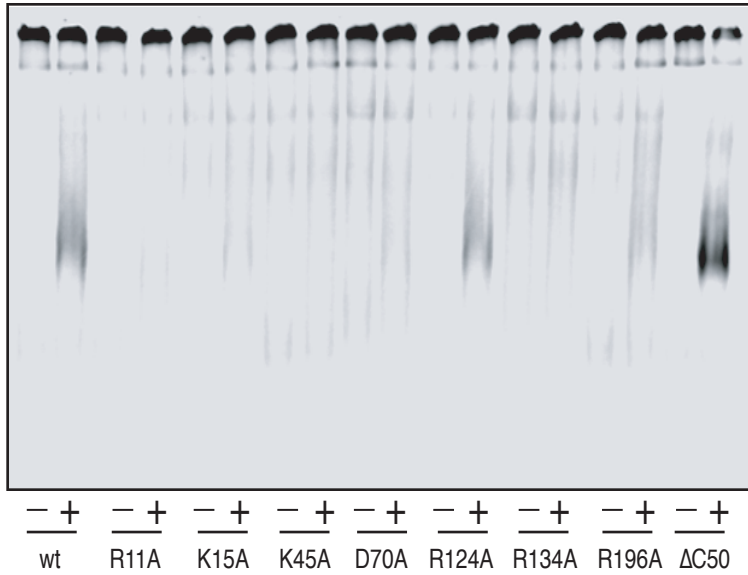

**b**

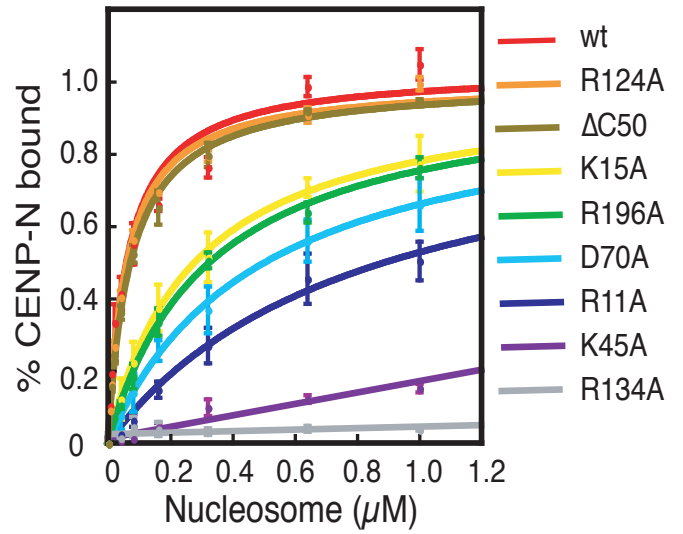

**c**

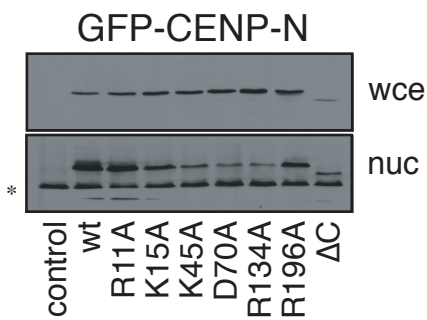

**d**

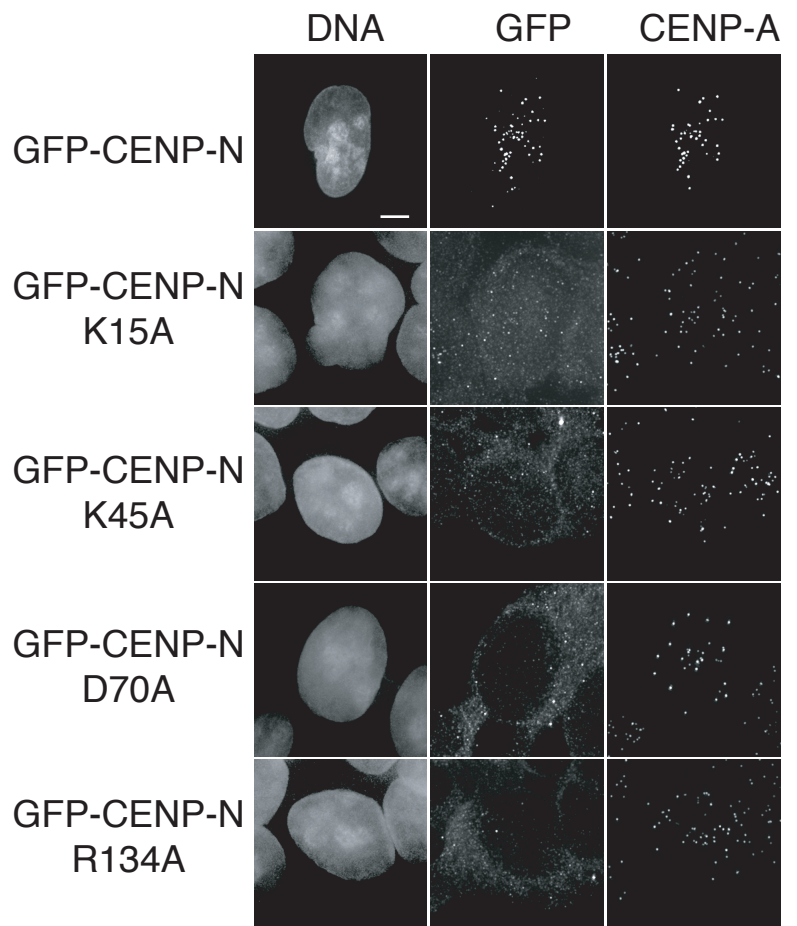

Supplement: NIHMS103675-supplement-5.pdf [file NIHMS103675-supplement-5.pdf]

Figure S4

a

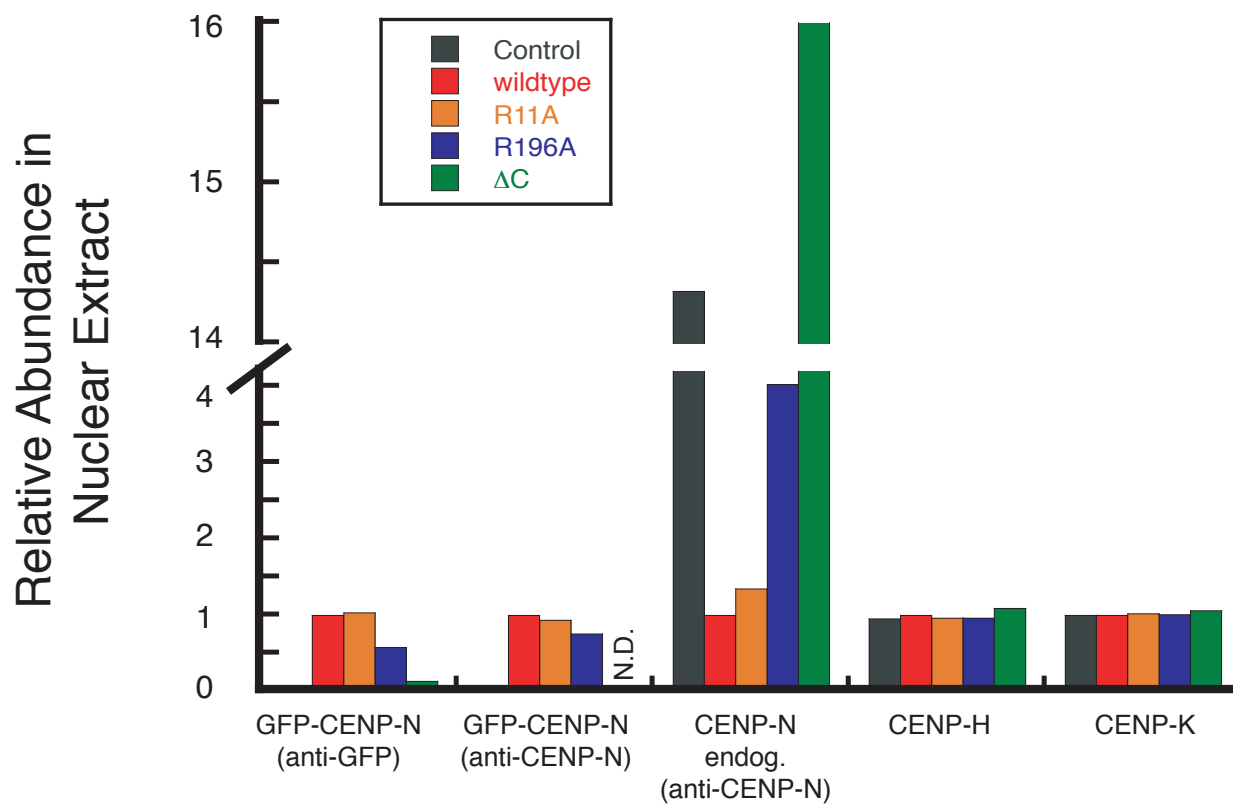

b

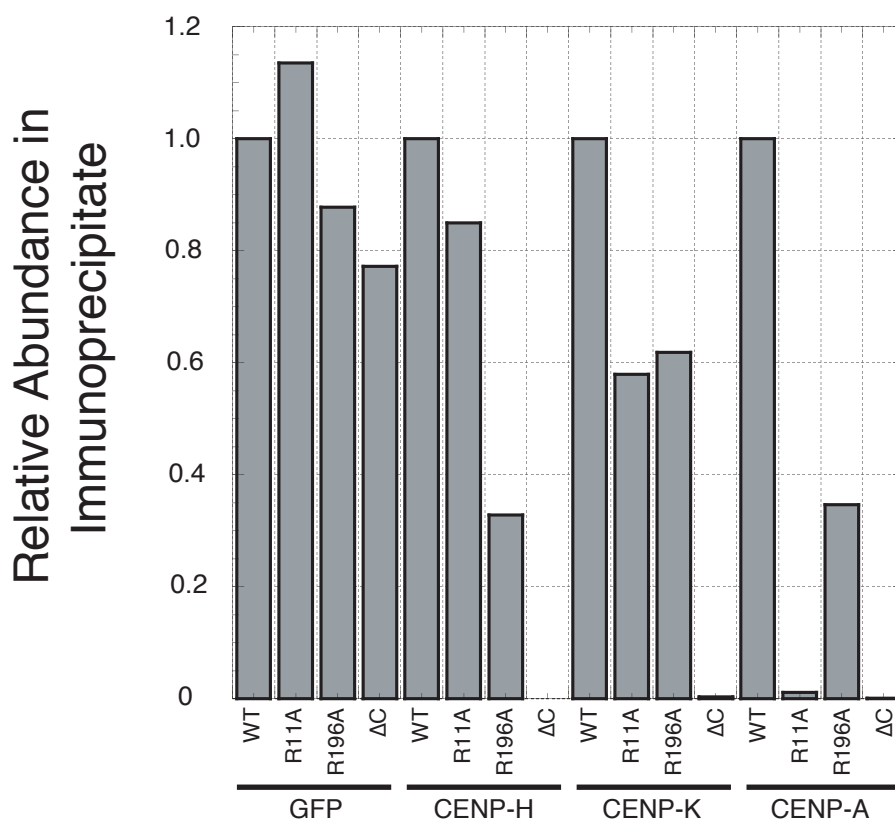

Supplement: NIHMS103675-supplement-6.pdf [file NIHMS103675-supplement-6.pdf]

Figure S5

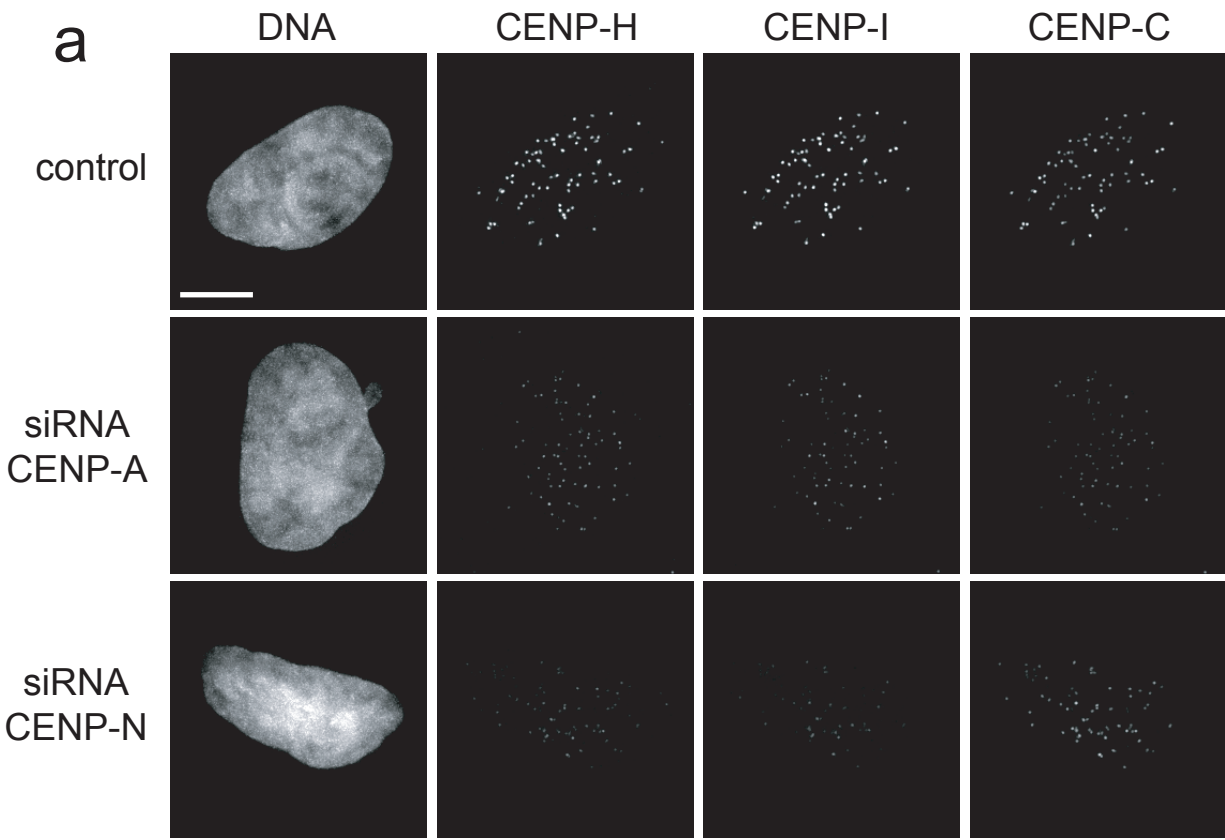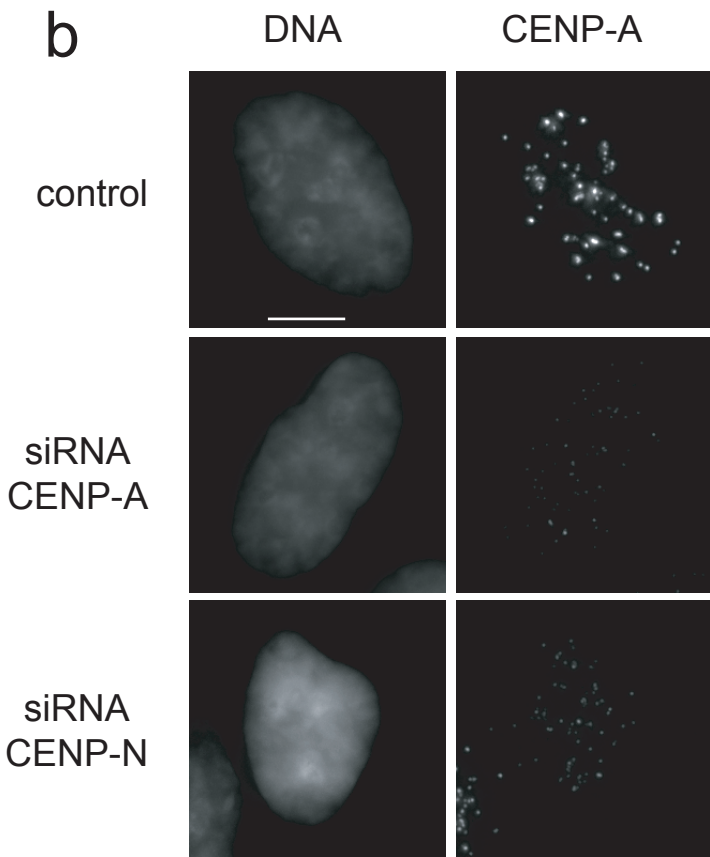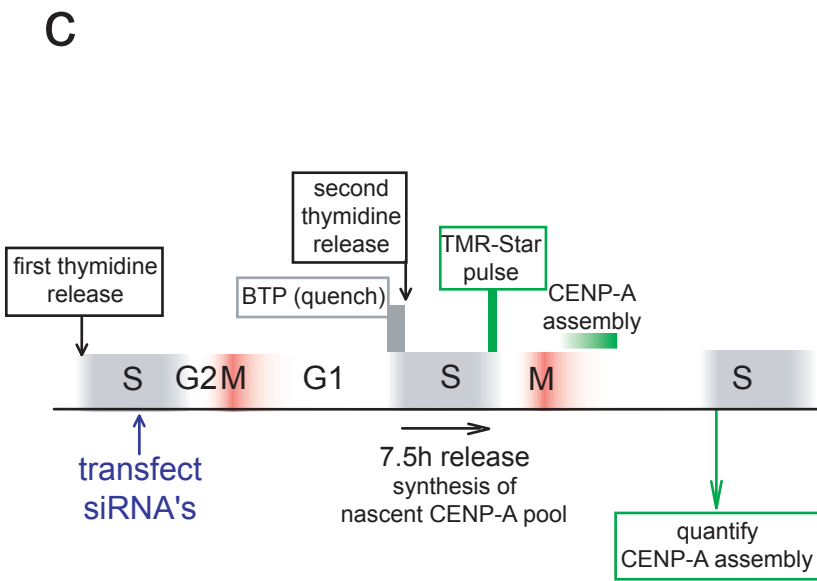

Supplement: NIHMS103675-supplement-7.pdf [file NIHMS103675-supplement-7.pdf]
